# Supplementary material
Source: publisher figshare collection journal article supplement (https://tandf.figshare.com/ndownloader/files/20115290)
Supplement: Supplementary file 1 [file 20115290]

**ⓢ Supporting information**

Physical hydrogels prepared from cationically modified pectin with tunable sol-gel phase transition behaviors

Nootcharee Kunkit1,4, Thanapon Deekaikam1, Saranporn Chaimuang2, Jeeraporn Pekkoh2 and Kiattikhun Manokruang1,3*

1Department of Chemistry, Faculty of Science, Chiang Mai University, Chiang Mai 50200, Thailand

2Department of Biology, Faculty of Science, Chiang Mai University, Chiang Mai 50200, Thailand

3Materials Science Research Center, Faculty of Science, Chiang Mai University, Chiang Mai 50200, Thailand

4Graduate School, Chiang Mai University, Chiang Mai 50200, Thailand

**E-mail : kiattikhun.m@cmu.ac.th*

**Determination of the grafting oercentage of APA on the copolymers by proton nuclear magnetic resonance (1H-NMR) spectroscopy.**

Structural characterization of pec-*g*-APA copolymerswas determined by using 1H-NMR spectroscopic technique in D2O. 1H-NMR spectra were recorded by a 400 MHz NMR spectrometer (Bruker Model Avance) at room temperature and proton chemical shifts (δ) were given in ppm. Also, the percentage of the APA grafted on pectin can be quantitatively determined by the integration ratio of methoxy proton (H-4) of pectin and the methylene protons of APA (2, 4, 6 and 8) unit through the following equation;

*grafting percentage =*

𝐼APA and 𝐼pec are integration bands of the methylene protons of APA (2, 4, 6 and 8) and the methoxy protons of pectin (H-4) respectively. The NMR spectra of the reactants (native pectin and APA) were shown in **Figure S.1** and the integration bands of the copolymers were shown in **Figure S.2** for pec-*g*-APA0.50, pec-*g*-APA0.45 and pec-*g*-APA0.40. The results showed that the grafting values of the APA were 46, 34 and 28 %, respectively for pec-*g*-APA0.50, pec-*g*-APA0.45 and pec-*g*-APA0.40.


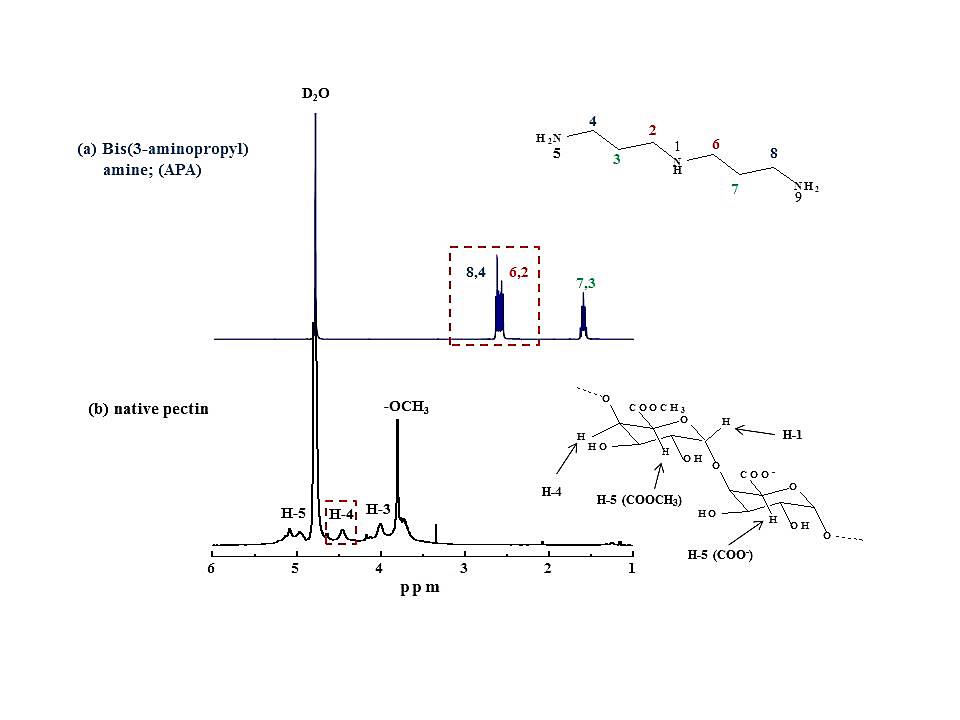


**Figure S.1.** 1H-NMR spectra of the reactants polymer (native pectin and APA)


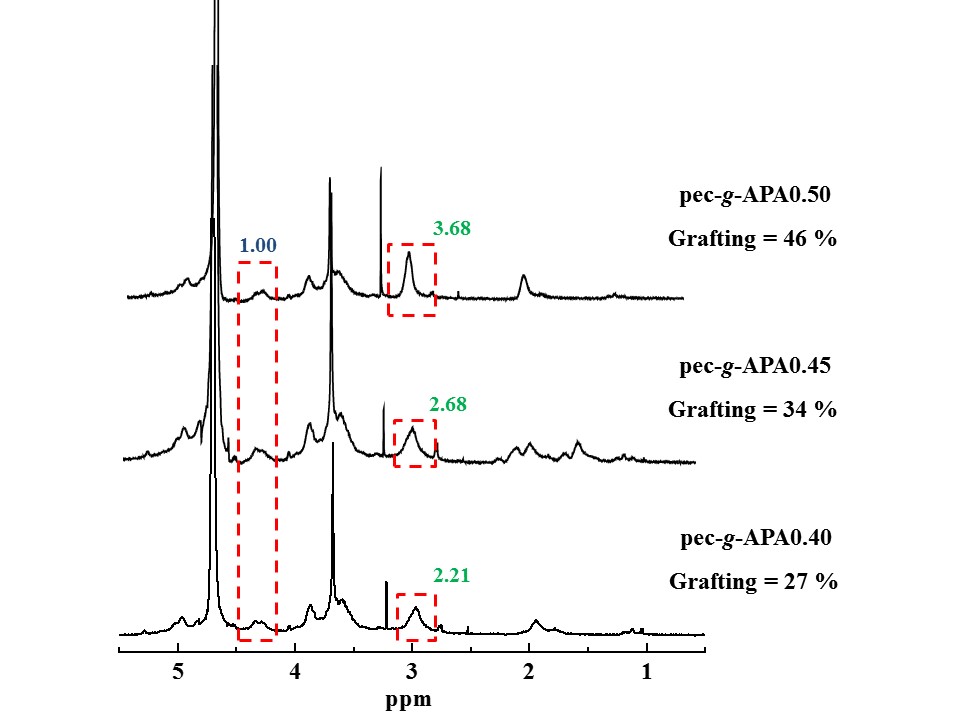


**Figure S.2.** APA grafting percentages were 46, 34 and 28%, respectively for pec-*g*-APA0.50, pec-*g*-APA0.45 and pec-*g*-APA0.40.
